# Supplementary figures and images for: Expression of endocannabinoid system components in human airway epithelial cells: impact of sex and chronic respiratory disease status
Source: PubMed Central journal article supplement — ERJ Open Res. 2020 Dec 14;6(4):00128-2020. doi: 10.1183/23120541.00128-2020 (PMC7737429; doi:10.1183/23120541.00128-2020), 2020-12-14

# Supplement Figure 1

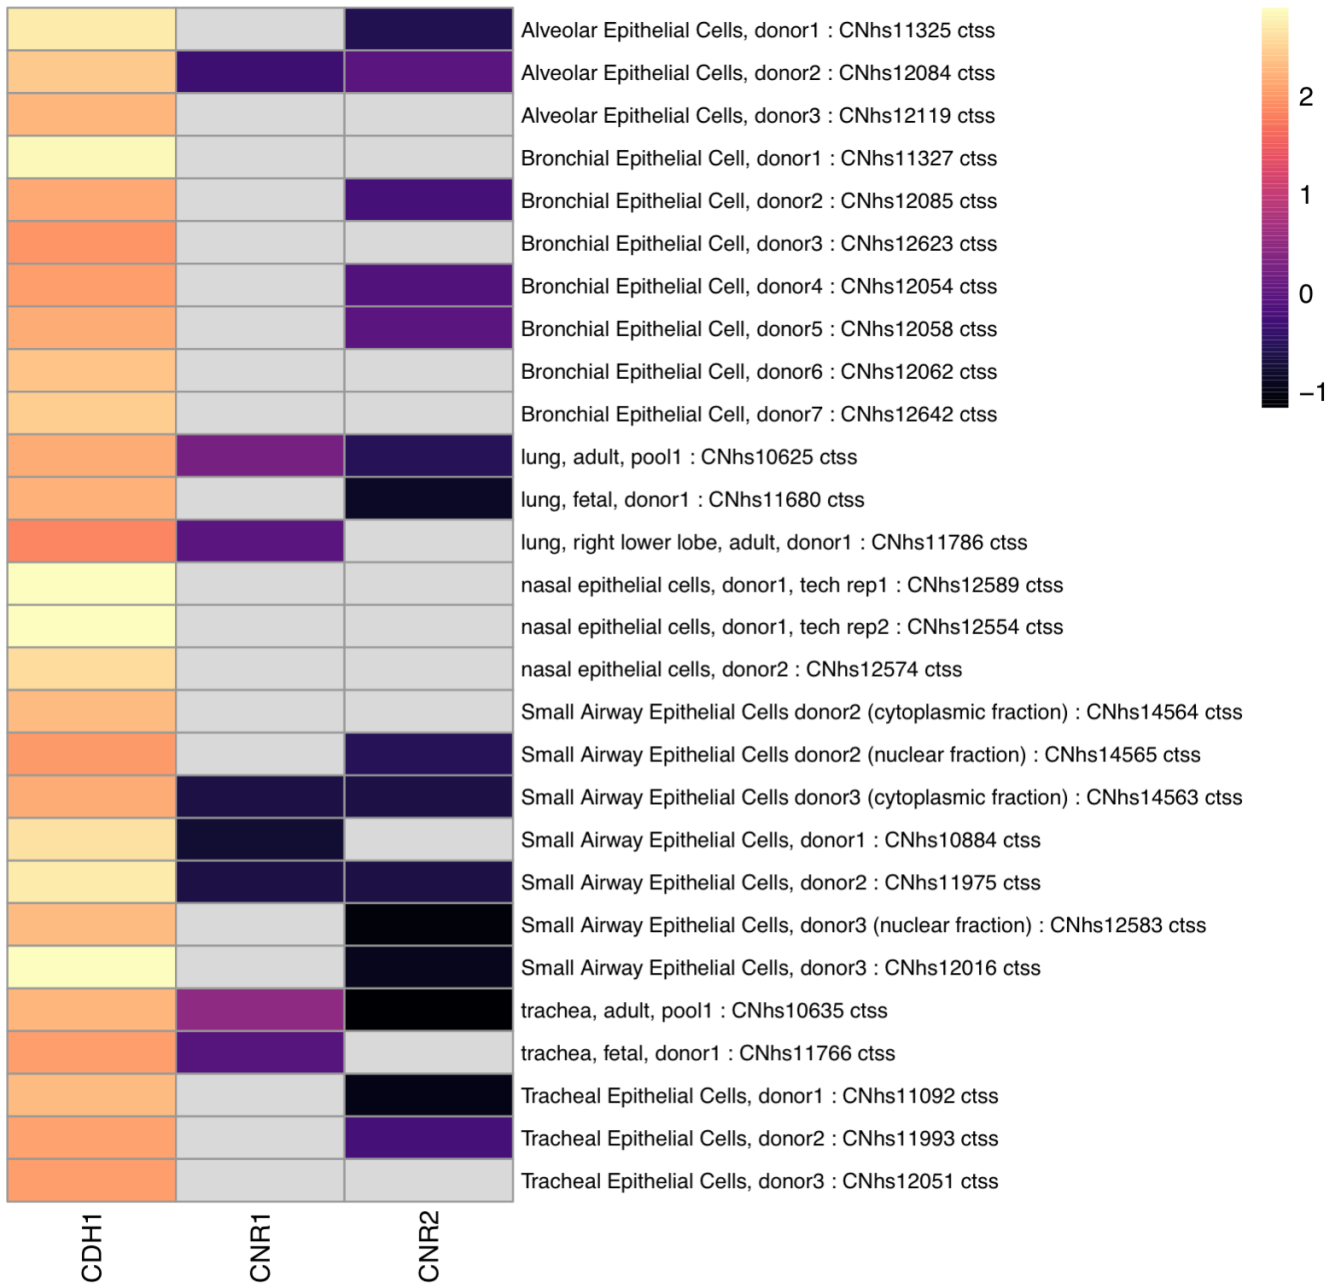

Supplement: 00128-2020.figureS1.pdf [file 00128-2020.figureS1.pdf]
